# Supplementary material
Source: publisher site journal article supplement (https://www.dovepress.com/article/327158)

**Supplementary Table 1. Individual Responses to Newest Vital Sign**

| **Patient correctly answers:** | N=155 |
| --- | --- |
| 1. If you eat the entire container, how many calories will you eat? | 106 (68.4) |
| 1. If you are allowed to eat 60g of carbohydrates as a snack, how much ice cream could you eat? | 121 (78.1) |
| 1. Your doctor advises you to reduce the amount of saturated fat in your diet. You usually have 42g of saturated fat each day, which includes 1 serving of ice cream. If you stop eating the ice cream, how many grams of saturated fat would you be consuming each day? | 77 (50.0) |
| 1. If you usually eat 2500 calories in a day, what percentage of your daily values of calories will you be eating if you eat one serving? | 70 (45.2) |
| 1. Pretend that you are allergic to the following substances: Penicillin, Peanuts, Latex gloves, and bee stings. Is it safe for you to eat this ice cream? | 131 (84.5) |
| 1. Why not? | 115 (74.2) |
| Total Newest Vital Sign Score | 4 (2, 6) |

Notes: Responses are expressed as N correct (%). Total score, shown as median (interquartile range), was calculated from the sum of correct responses. Adapted from Weiss BD, Mays MZ, Martz W, et al. Quick assessment of literacy in primary care: the newest vital sign. Ann Fam Med. 2005;3(6):514–522.15

**Supplementary Table 2. Individual Responses to Multidimensional Scale of Perceived Social Support**

| **Patient agrees with the following:** | N=156 |
| --- | --- |
| 1. There is a special person around when I am in need. | 7 (5, 7) |
| 1. There is a special person with whom I can share my joys and sorrows. | 7 (6, 7) |
| 1. My family really tries to help me. | 7 (5, 7) |
| 1. I get the emotional help and support I need from my family. | 6 (5, 7) |
| 1. I have a special person who is a real source of comfort to me. | 7 (6, 7) |
| 1. My friends really try to help me. | 6 (4, 7) |
| 1. I can count on my friends when things go wrong. | 6 (4, 7) |
| 1. I can talk about my problems with my family. | 6 (4, 7) |
| 1. I have friends with whom I can share my joys and sorrows. | 6 (5, 7) |
| 1. There is a special person in my life who cares about my feelings. | 7 (6, 7) |
| 1. My family is willing to help me make decisions. | 6 (5, 7) |
| 1. I can talk about my problems with my friends. | 6 (4, 7) |
| Significant Other Subscale | 6.8 (5.8, 7) |
| Family Subscale | 6.3 (5, 7) |
| Friends Subscale | 6 (4.5, 7) |
| Total Perceived Social Support Score | 6 (4.9, 6.8) |

Notes: Participants responded to each question on a Likert scale ranging from 1 (very strongly disagree) to 7 (very strongly agree). Individual responses are expressed as median (interquartile range). Subscale and total scores are averaged from individual responses. Adapted from Zimet GD, Dahlem NW, Zimet SG, Farley GK. The multidimensional scale of perceived social support. J Pers Assess. 1988;52(1):30–41.16

**Supplementary Table 3. Individual Responses to Diabetes Empowerment Scale Short Form**

| **Patient agrees with the following:** | N=156 |
| --- | --- |
| 1. Know what parts of taking care of my diabetes that I am dissatisfied with. | 4 (4, 5) |
| 1. Am able to turn my diabetes goals into a workable plan | 5 (4, 5) |
| 1. Can try out different ways of overcoming barriers to my diabetic goals | 5 (4, 5) |
| 1. Can find ways to feel better about having diabetes | 5 (4, 5) |
| 1. Know the positive ways I cope with diabetes-related stress. | 4 (3, 5) |
| 1. Can ask for support for having and caring for my diabetes when I need it. | 5 (4, 5) |
| 1. Know what helps me stay motivated to care for my diabetes. | 5 (4, 5) |
| 1. Know enough about myself as a person to make diabetes care choices that are right for me. | 5 (4, 5) |
| Total Diabetes Empowerment Scale Short Form Score | 4.4 (4, 4.8) |

Notes: Participants responded to each question on a Likert scale ranging from 1 (strongly disagree) to 5 (strongly agree). Individual responses are expressed as median (interquartile range). The DES-SF project described here was supported by Grant Number P30DK020572 (MDRC) from the National Institute of Diabetes and Digestive and Kidney Diseases. Adapted with permission from Pamela A Campbell. Available from: https://medicine.umich.edu/dept/diabetes/affiliated-centers/michigan-diabetes-research-center/resources/tools-health-professionals/survey-instruments.

**Supplementary Figure 1. Patient Flow Diagram**


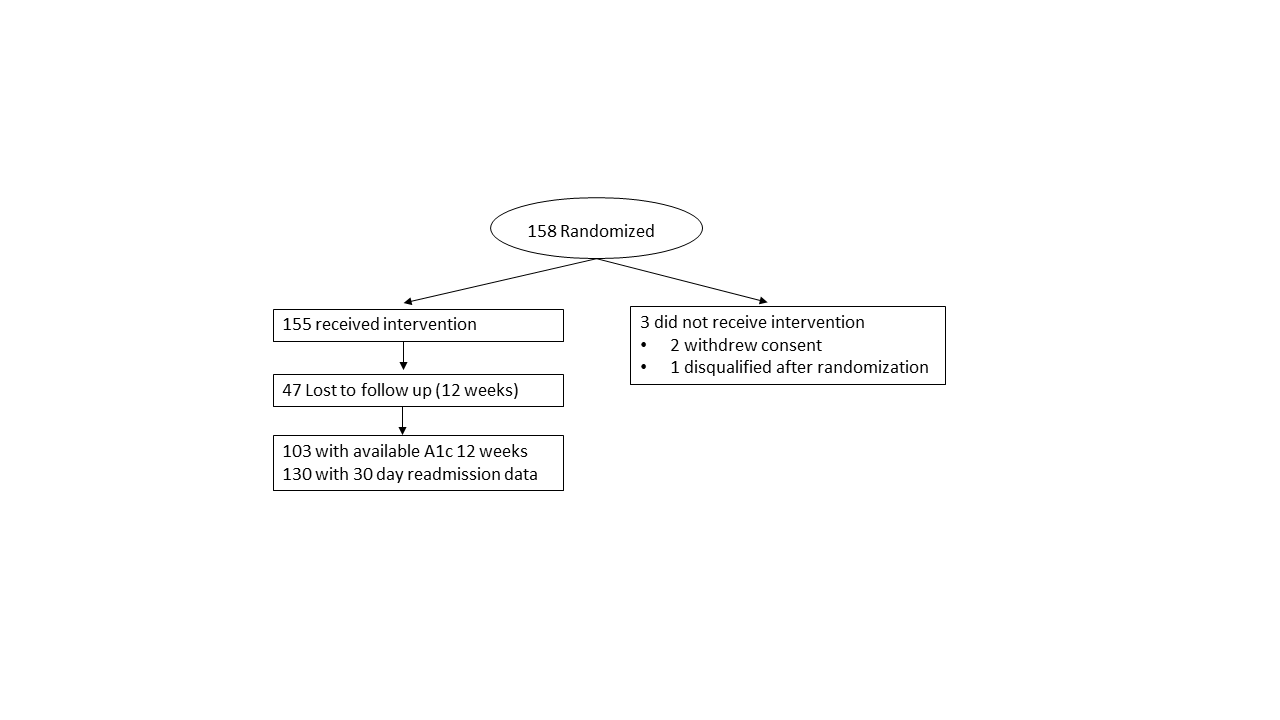

Supplement: Supplementary file 1 [file get_supplementary_file.php]
